# Supplementary material for: Controllable crystalline structure of fullerenenanorods and transport properties of an individual nanorod
Source: Royal Society of Chemistry journal article supplement (doi:10.1039/b712696d), 2007-11-23
Supplement: b712696d.pdf [file b712696d.pdf]

## Supporting Information

### Controllable Crystalline Structure of Fullerene Nanorods and Transport

#### Property of an Individual Nanorod

Heng-Xing Ji<sup>a,b</sup>, Jin-Song Hu<sup>a</sup>, Li-Jun Wan<sup>a,\*</sup>, Qing-Xin Tang<sup>a,b</sup>, Wen-Ping Hu<sup>a,\*</sup>

<sup>a</sup>Beijing National Laboratory for Molecular Sciences (BNLMS), Institute of Chemistry,

Chinese Academy of Sciences (CAS), Beijing 100080, China; <sup>b</sup>Also in Graduate

School of CAS, Beijing, China

[\*] Corresponding Author; E-mail, [wanlijun@iccas.ac.cn](mailto:wanjijun@iccas.ac.cn); [huwp@iccas.ac.cn](mailto:huwp@iccas.ac.cn)

A. The concentration of C<sub>60</sub> in stock solution has a strong effect on the length of the rods, which is the concentration of C<sub>60</sub> in inverse proportion to the logarithmic length of the rod.

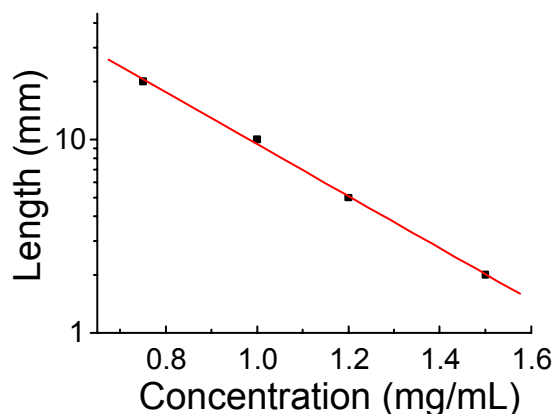

Figure S1. Concentration dependence of the average length of fcc structured pristine C<sub>60</sub> nanorod.

B. The FTIR spectrum (figure S2a) and XRD pattern (figure S2b) of  $C_{60}$  nanorod which in different crystal structures (hcp and fcc) are compared. It can be seen (figure S2a) that the m-xylene absorption peaks at  $766.7$  and  $689.5$   $\text{cm}^{-1}$  in the FTIR spectrum of hcp structured  $C_{60}$  nanorod disappear in that of fcc structured  $C_{60}$  nanorod. XRD patterns in figure S2b conclude that the  $C_{60}$  nanorods in different crystal were obtained successfully.

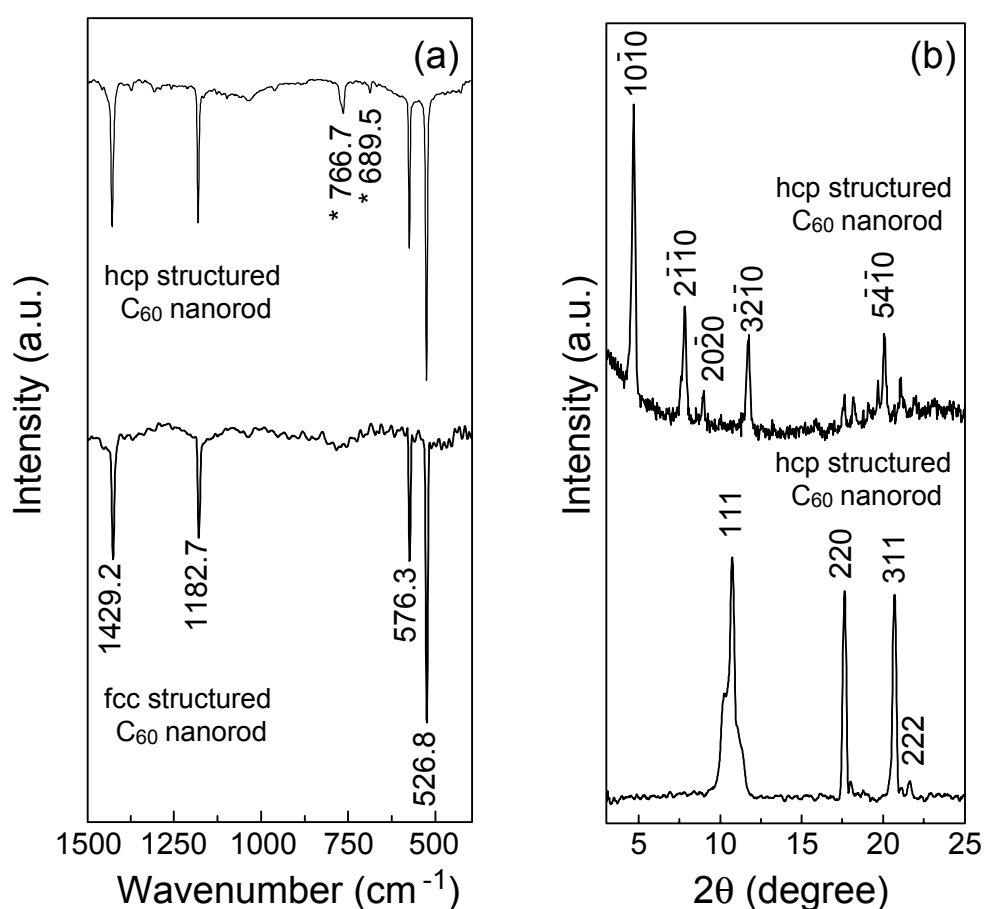

Figure S2. FTIR spectrum (a) of  $C_{60}$  nanorods in hcp (upper panel) and fcc (lower panel) structure, respectively. The asterisks indicate the solvent peaks. XRD patterns (b) obtained with  $C_{60}$  nanorods in hcp (upper panel) and fcc (lower panel) crystal structure.

C. Two types of devices were fabricated by FIB technique. Type I device (figure S3a) was constructed with the hcp structured  $C_{60}$  rod, while type II device (figure S3b) was fabricated with fcc  $C_{60}$  rod. After the FIB process, both of the two devices were not annealed before I-V measurement. The I-V curves of them were shown in figure S3c and S3d. The I-V measurement was repeated from three different devices of both types. The derived conductivities of them are  $4.8 \times 10^{-4}$  S/m (device type I) and  $7.0 \times 10^{-3}$  S/m (device type II), respectively.

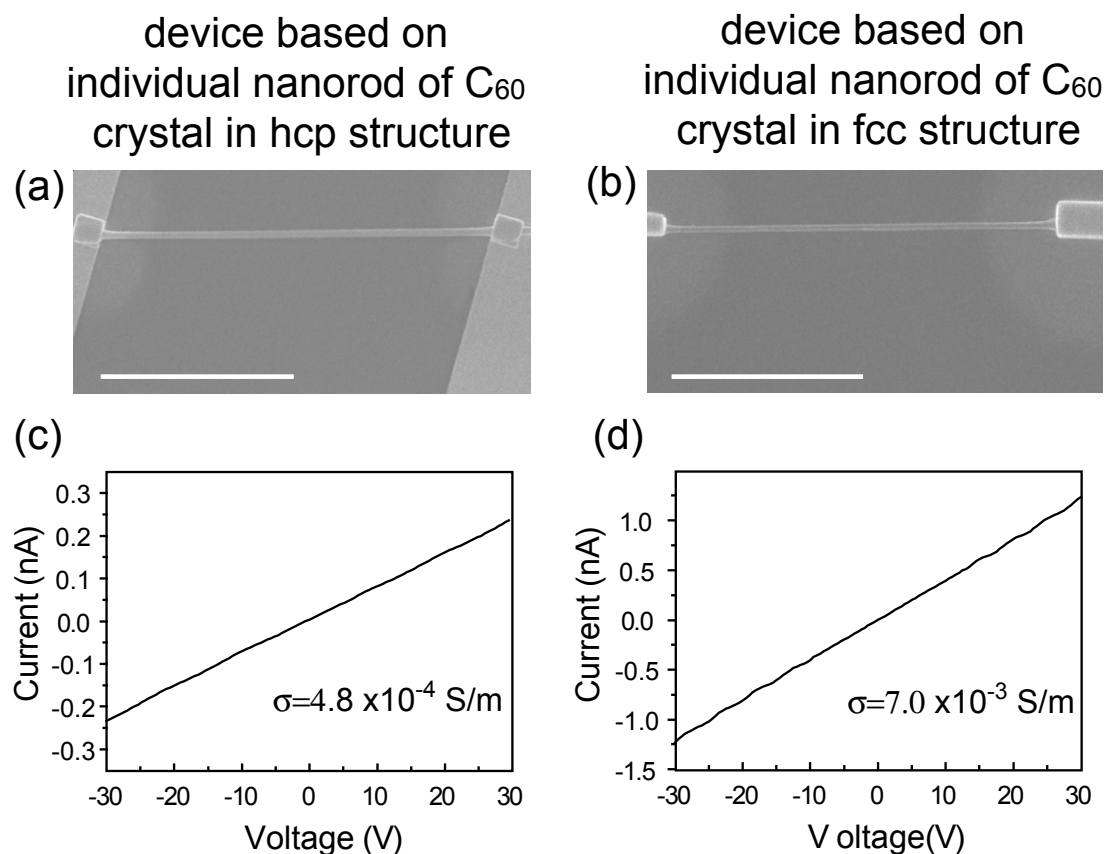

Figure S3. Typical SEM images of the individual single-crystalline  $C_{60}$  rod based devices of type I (a) and type II (b); the scale bars in them are 10  $\mu\text{m}$ . I-V characteristic of individual single-crystalline  $C_{60}$  rod based devices of type I (c) and type II (d).
